# Supplementary material for: Current physical therapy practice and implementation factors regarding the evidence-based ‘Rehabilitation of Mobility after Stroke (ReMoS)’ guideline in Germany: a cross-sectional online survey
Source: Springer Nature journal article supplement (doi:10.1186/s12883-022-02780-5), 2022-07-30
Supplement: MOESM4 [file 23320756]

Additional file 3.

Responses on open-ended questions according therapy-goal directed interventions within ReMoS guideline domains.

| <b>Improving ability to walk in non-ambulant patients</b> | <b>n</b> | <b>Improving ability to walk in (partially) ambulant patients</b> | <b>n</b> | <b>Improving walking distance</b> | <b>n</b> | <b>Improving walking speed</b>             | <b>n</b> | <b>Improving balance</b>                                  | <b>n</b> |
|-----------------------------------------------------------|----------|-------------------------------------------------------------------|----------|-----------------------------------|----------|--------------------------------------------|----------|-----------------------------------------------------------|----------|
| Concept-based interventions                               | 22       | Concept-based interventions                                       | 8        | Task-specific gait training       | 3        | Concept-based interventions                | 8        | Balance training using modified supporting area           | 10       |
| Functional training                                       | 10       | Strength training                                                 | 3        | Forms of endurance training       | 3        | Ergometer training (including water-based) | 1        | Concept-based interventions                               | 7        |
| Gait training using walking aids                          | 10       | Trunk training (mobilisation and stabilisation)                   | 3        | Gait training using treadmill     | 2        | Feedback on walking distance               | 1        | Task-specific balance training                            | 4        |
| Training of activities of daily living                    | 5        | Gait training using treadmill                                     | 2        | Concept-based interventions       | 2        | Hippotherapy                               | 1        | Balance training using destabilising impulses on the body | 3        |

|                                                   |   |                                           |   |                            |   |                                  |   |                            |   |
|---------------------------------------------------|---|-------------------------------------------|---|----------------------------|---|----------------------------------|---|----------------------------|---|
| Balance training with and without therapy devices | 4 | Gait training using walking aids          | 2 | Respiratory therapy        | 1 | Co-ordination training           | 1 | Bicycle ergometer training | 1 |
| Leg trainer (Motomed)                             | 3 | Balance training                          | 2 | Conventional gait training | 1 | Neuromobilization                | 1 | Strength training          | 1 |
| Strength training                                 | 3 | Stairs training                           | 2 |                            |   | Trunk training                   | 1 | Patient education          | 1 |
| Conventional gait training                        | 3 | Movement exercise with visual control     | 1 |                            |   | Mental training (mirror therapy) | 1 | Sensitivity training       | 1 |
| Trunk training (mobilisation and stabilisation)   | 3 | Electro-mechanical assisted gait training | 1 |                            |   | Medical Taping                   | 1 |                            |   |

|                                                               |   |                                                               |   |
|---------------------------------------------------------------|---|---------------------------------------------------------------|---|
| Movement therapy in lying position                            | 2 | Additional fitness training                                   | 1 |
| Foot orthosis                                                 | 2 | Functional electrostimulation in combination with exoskeleton | 1 |
| Electro-mechanical assisted gait training                     | 1 | Gait training with acoustic stimulation (music)               | 1 |
| Functional electrostimulation                                 | 1 | Fall training                                                 | 1 |
| Functional electrostimulation in combination with exoskeleton | 1 | Medical taping                                                | 1 |

Movement therapy using  
sling table 1

Group exercise 1

Mental training (imaginary  
journeys) 1

Medical taping 1

Training of sensory-motor  
perception 1

---
